# Supplementary material
Source: Springer Nature journal article supplement (https://www.springermedizin.de/resource/supplementary/12913_2008_795_MOESM1_ESM.pdf/9535598)
Supplement: MOESM1 [file 9535598]

**Table 1:** *Characteristics of the case management models in the seven included papers*

| Ref. | Authors, publication year, country, setting and location                                                         | a) Aim<br>b) Patients and cancer type<br>c) Name of intervention<br>d) CM setting<br>e) Control group exposure                                                                                                                                                                                 | a) Contact mode<br>b) Quantity of intervention<br>c) Intervention duration                                                                                                                                                                                                                                                                                                              | a) Numbers of case managers<br>b) Cm education<br>c) Cm training in the CM-model<br>d) CM manual, tools, or the like                                                                                                                                                                                                                             | Effects studied                                                                                                                                  |
|------|------------------------------------------------------------------------------------------------------------------|------------------------------------------------------------------------------------------------------------------------------------------------------------------------------------------------------------------------------------------------------------------------------------------------|-----------------------------------------------------------------------------------------------------------------------------------------------------------------------------------------------------------------------------------------------------------------------------------------------------------------------------------------------------------------------------------------|--------------------------------------------------------------------------------------------------------------------------------------------------------------------------------------------------------------------------------------------------------------------------------------------------------------------------------------------------|--------------------------------------------------------------------------------------------------------------------------------------------------|
| [19] | Goodwin, 2003, USA, 13 community and two public hospitals in southeastern Texas (multicenter trial)              | a) To assess the efficacy of nurse case management (NCM) in improving the medical care given to community-living older women diagnosed with breast cancer.<br>b) Women aged 65 and older with newly diagnosed breast cancer.<br>c) Nurse CM<br>d) Hospital-to-community.<br>e) ? (usual care?) | a) Home visits, telephone conversations, assist the patient at physician appointments, visiting the patient at hospital, and contacts made at other community locations.<br>b) Patient needs determined the frequency of contact, minimum contact during the intervention period was at least one in-person assessment and monthly telephone calls.<br>c) 12 months from first contact. | a) Three case managers<br>b) Baccalaureate degree registered nurse with previous experience with CM in other settings.<br>c) 40 hours of training and education in treatment, complications, community resources, assessment, communicating methods, etc.<br>d) A checklist and several assessment tools (not used or analyzed by investigators) | Primary: cancer-specific therapies received<br><br>Secondary: patient evaluations of the decision-making process; arm function on affected side. |
| [23] | Ritz, LJ et al, 2000, USA, One hospital in an integrated health care system in a mid-western suburban community. | a) To evaluate the quality of life (QoL) and cost outcomes of CM on women with newly diagnosed breast cancer.<br>b) Women, 21 years of age and older, newly diagnosed from breast cancer.<br>c) Advanced practice nursing<br>d) Hospital-to-community<br>e) “standard medical care”            | a) During clinic visits, hospital, by telephone, and home visits.<br>b) Patient, family and CM need-determined. CM on-call all days during the daytime.<br>c) ?                                                                                                                                                                                                                         | a) Two advanced practice nurses<br>b) Registered nurse with a master’s degree in nursing who has in-depth knowledge and skill in the care of the patient population.<br>c) ?<br>d) Manual not mentioned, but model developed on Broton cost-quality model (ref), but modified and ONS Standards of Advanced Practice (ref).                      | Quality of Life measures<br>Cost data                                                                                                            |
| [25] | McCorkle, R. et al, 1989, USA, subject recruitment from 19 hospitals and one                                     | a) To test the effects of two different home care treatment regimens against usual care on the psychosocial well-being of patients                                                                                                                                                             | a) Home visits (weak description)<br>b) ?<br>c) 24 weeks.                                                                                                                                                                                                                                                                                                                               | <i>OHC:</i><br>a) ? b) Nurses with master degrees c) ? (“trained to give personalized care to persons with                                                                                                                                                                                                                                       | Patient Psychosocial Responses<br>Number of hospitalizations<br>Length of Stay (LOS)                                                             |

| Ref. | Authors, publication year, country, setting and location                                                                              | a) Aim<br>b) Patients and cancer type<br>c) Name of intervention<br>d) CM setting<br>e) Control group exposure                                                                                                                                                                                                                                                                                                                                                                             | a) Contact mode<br>b) Quantity of intervention<br>c) Intervention duration                                                                                                                                                             | a) Numbers of case managers<br>b) Cm education<br>c) Cm training in the CM-model<br>d) CM manual, tools, or the like                                                                                                                            | Effects studied                                                                                                                                                                                            |
|------|---------------------------------------------------------------------------------------------------------------------------------------|--------------------------------------------------------------------------------------------------------------------------------------------------------------------------------------------------------------------------------------------------------------------------------------------------------------------------------------------------------------------------------------------------------------------------------------------------------------------------------------------|----------------------------------------------------------------------------------------------------------------------------------------------------------------------------------------------------------------------------------------|-------------------------------------------------------------------------------------------------------------------------------------------------------------------------------------------------------------------------------------------------|------------------------------------------------------------------------------------------------------------------------------------------------------------------------------------------------------------|
|      | radiation outpatient facility; King County, Washington                                                                                | with lung cancer.<br>b) Homebound patients suffering from lung cancer, stage II or higher.<br>c) home care interventions: Specialized oncology home care program, and Standard home care program<br>d) Community<br>e) “traditional treatment by patient’s physicians”                                                                                                                                                                                                                     |                                                                                                                                                                                                                                        | advanced cancer and their families “) d) ?<br><i>SHC:</i><br>a) ? (a team) b) An interdisciplinary team of health professionals including registered nurses; c) ? d) ?                                                                          |                                                                                                                                                                                                            |
| [24] | McCorkle, R et al, 2000, USA, out-patient setting at a Comprehensive Cancer Center in south-eastern Pennsylvania                      | a) To analyse whether follow-up by an advanced practice nurse can improve survival when compared to patients in an ambulatory setting.<br>b) Patients aged 60 years or older newly diagnosed with and operated from a solid tumour (different types) having an anticipated survival of 6 months or more (primary surgical removal of cancer only).<br>c) Advanced practice nurse specialized home care intervention.<br>d) Community<br>e) “usual follow-up care in an ambulatory setting” | a) Home visits and telephone.<br>b) Pre-determined home visits (three) and telephone calls (five) + according to patients’ needs. APNs were available on a 24-hours basis.<br>c) 4-weeks immediately after surgery and hospitalization | a) ?<br>b) Advanced practice nurses (are masters prepared clinicians in oncology).<br>c) ?<br>d) A standardized protocol consisting of standard assessment and management guidelines, doses of instructional content and schedules of contacts. | Primary: Length of survival<br><br>Secondary: Identify psychosocial and clinical predictors of survival                                                                                                    |
| [26] | Engelhardt, JB et al, 2006, USA, three Dep. of Veterans Affairs Medical Centers (=VAMCs), a home care org., and two Managed Care Org. | a) To evaluate the Advanced Illness Coordinated Care Program (AICCP) on patient and surrogate satisfaction with health care and provider communication, Advance directive (=AD) wishes and health care costs.<br>b) Patients suffering from advanced illness (Specified cancer diagnoses                                                                                                                                                                                                   | a) In-patient meetings (?)<br>b) 6-session format, but individualized. Patients could schedule extra meetings.<br>c) ?                                                                                                                 | a) ? (6 sites)<br>b) Nurses, nurse practitioners, or social workers familiar with institutional policies and who had ongoing relationships with providers (existing personnel who were replaced from normal duties).                            | Patients’ evaluations of patient/provider communication, satisfaction with care, and attitudes about participation in treatment planning.<br>Surrogates’ experiences with the health care system.<br>Costs |

| Ref. | Authors, publication year, country, setting and location                                                      | a) Aim<br>b) Patients and cancer type<br>c) Name of intervention<br>d) CM setting<br>e) Control group exposure                                                                                                                                                                                                                     | a) Contact mode<br>b) Quantity of intervention<br>c) Intervention duration                                                                                                                                                                                | a) Numbers of case managers<br>b) Cm education<br>c) Cm training in the CM-model<br>d) CM manual, tools, or the like                                                                                                                  | Effects studied                                                                                                                                        |
|------|---------------------------------------------------------------------------------------------------------------|------------------------------------------------------------------------------------------------------------------------------------------------------------------------------------------------------------------------------------------------------------------------------------------------------------------------------------|-----------------------------------------------------------------------------------------------------------------------------------------------------------------------------------------------------------------------------------------------------------|---------------------------------------------------------------------------------------------------------------------------------------------------------------------------------------------------------------------------------------|--------------------------------------------------------------------------------------------------------------------------------------------------------|
|      |                                                                                                               | and advanced COPD and CHF patients)<br>c) The Advanced Illness Coordinated Care Program (care coordination)<br>d) ? (in-patient only?)<br>e) “usual care”                                                                                                                                                                          |                                                                                                                                                                                                                                                           | c) Training and reviewed assigned readings, including the AICCP training manual.<br>d) Manual, checklists, and worksheets.                                                                                                            | Advance directives (AD) and “do-not-resuscitate and intubate (DNR[I])” wishes.                                                                         |
| [22] | Mor, V et al, 1995, USA, two hospital based chemotherapy clinics and eight private medical oncology practices | a) To evaluate effect of a short-term, educationally-oriented CM model for chemotherapy patients.<br>b) Residents 21 years of age or more initiating a new course of chemotherapy (different cancer types).<br>c) Nurse CM<br>d) Community<br>e) Not mentioned (usual treatment?)                                                  | a) Home visits and telephone calls.<br>b) Pre-determined initial and termination home visit (about 10 weeks later), and telephone calls at 2-week intervals. Patient could contact Cm for assistance for up to 3 months..<br>c) 3 month follow-up period. | a) ?<br>b) Nurse<br>c) ?<br>d) Resource database (information about community service agencies, cancer-specific disease and treatment information).                                                                                   | Unmet needs<br>Symptom severity<br>Several dimensions of QoL<br>Formal service utilization                                                             |
| [27] | Moore, S et al, 2002, UK, one specialist cancer hospital and three local cancer units                         | a) To assess the effectiveness of a nurse-led follow up in the management of patients with lung cancer.<br>b) Lung cancer patients who had completed their initial anticancer treatment and were expected to survive for at least three months.<br>c) Nurse-led follow up<br>d) Hospital CM<br>e) “conventional medical follow-up” | a) Over telephone or in a nurse-led clinic.<br>b) Telephone assessment or clinic appointment two weeks after baseline, then every four weeks while patient is stable. Open access through clinic, telephone, and message pager service.<br>c) ?           | a) Two<br>b) Clinical nurse specialist<br>c) Observing outpatient lung cancer clinics and shadowing medical consultants. Regular clinical supervision sessions were given.<br>d) Reference to published article describing the model. | Primary: QoL and patients’ satisfaction<br><br>Secondary:<br>Overall, Symptom-free, and Progression-free survival.<br>GPs’ satisfaction<br>Service use |

?: Not to be found in the article

Cm: Case manager, CM: Case management

OHC: Specialized oncology home care program, SHC: Standard home care program, OC: Usual office care

AICCP: Advanced Illness Coordinated Care Program, APN: Advanced practice nursing

COPD: Chronic obstructive pulmonary disease, CHF: Chronic heart failure
